# Supplementary material
Source: publisher figshare collection journal article supplement (https://acs.figshare.com/ndownloader/files/5058232)
Supplement: Supplementary file 1 [file 5058232]

## Supporting Information

**Figure S1.** Perspective view of the 3D supramolecular network in **1**, highlighting the channels along the *b* axis. Guest water molecules and free anions included in the channels are omitted for clarity.

**Figure S2.** ORTEP drawing of **2** with thermal ellipsoids at 50 % probability. Other atoms have been omitted for clarity.

**Figure S3.** Representation of the coordination number of a  $[\text{Cr}(\text{OH})_6\text{Mo}_6\text{O}_{18}]^{3-}$  polyoxoanion.

**Figure S4.** View of the 3D framework in **3**, highlighting the channels along the *a* axis. Guest water molecules included in the channels are omitted for clarity.

**Figure S5.** (a) The XPS spectrum of compound **1**. (b) The XPS spectrum of compound **2**. (c) The XPS spectrum of compound **3**.

**Figure S6.** ESR spectrum of compound **3**, showing the signal of  $\text{Cr}^{3+}$ .

**Figure S7.** (a) The IR spectrum of compound **1**. (b) The IR spectrum of compound **2**. (c) The IR spectrum of compound **3**.

**Figure S8.** (a) The TG curve of compound **1**. (b) The TG curve of compound **2**. (c) The TG curve of compound **3**.

**Table S1.** Relevant hydrogen-bonding distances in **1**.

**Table S2.** Relevant hydrogen-bonding distances in **2**.

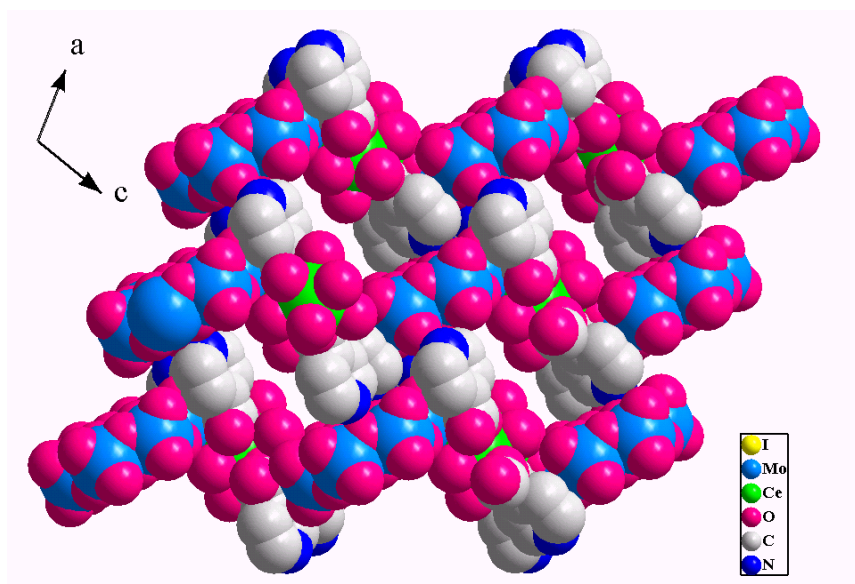

**Figure S1**

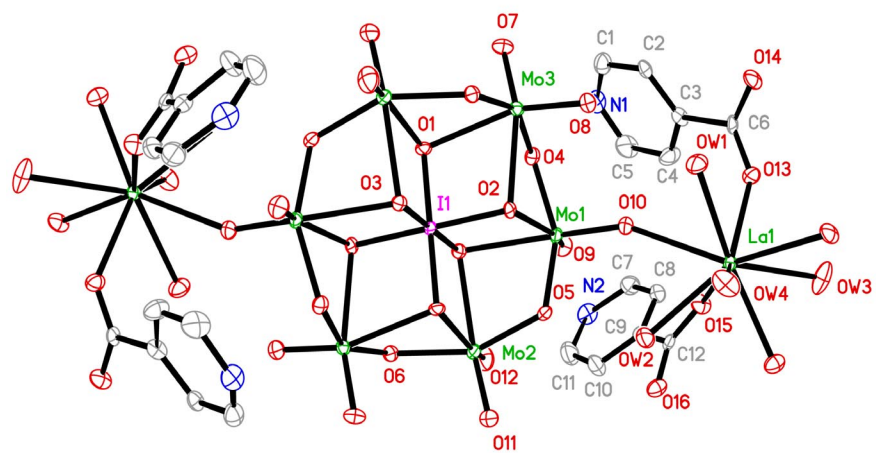

**Figure S2**

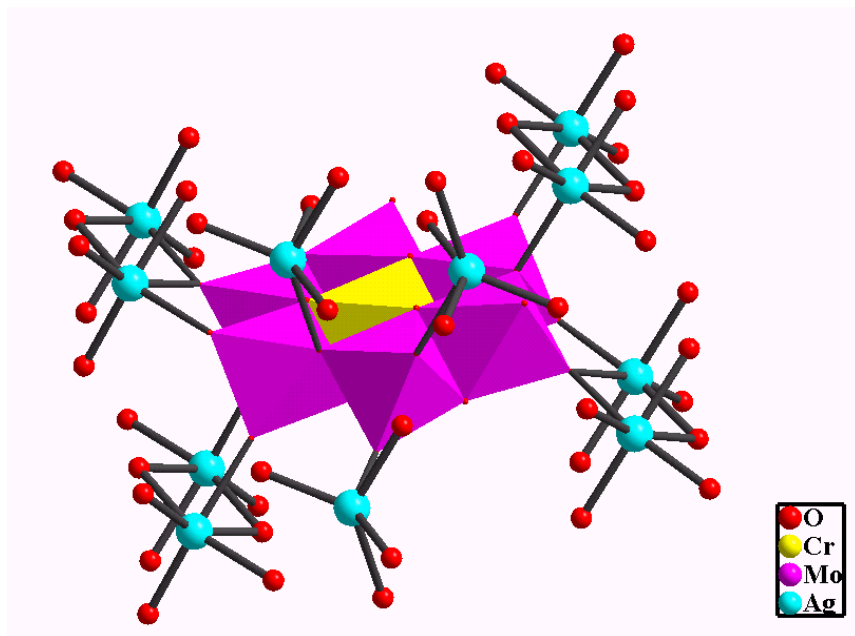

Figure S3

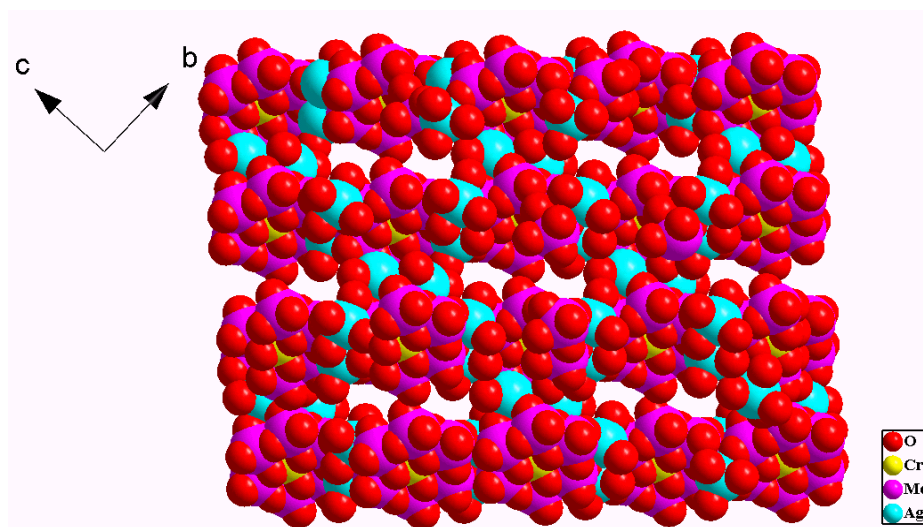

**Figure S4**

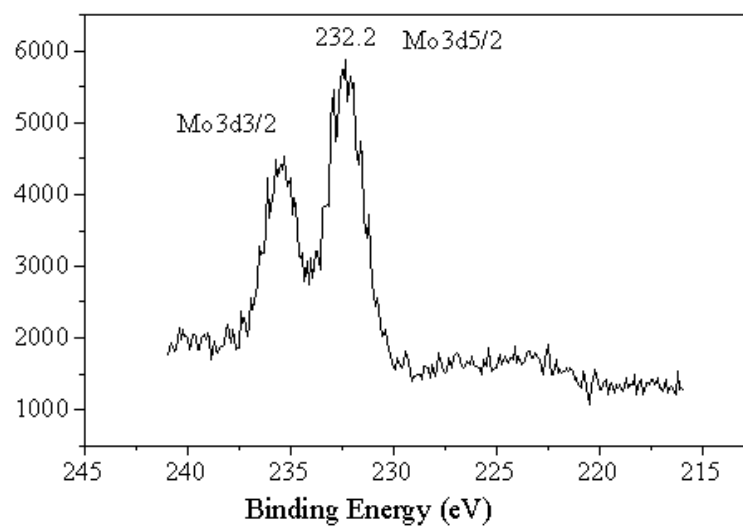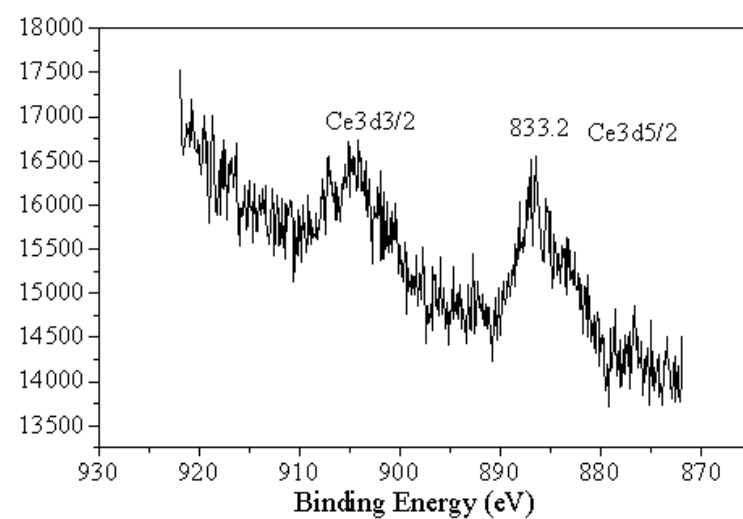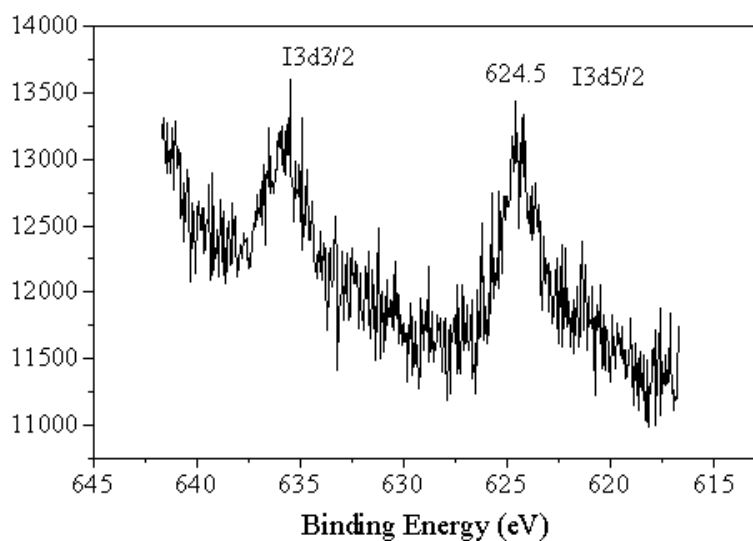

**Figure S5a**

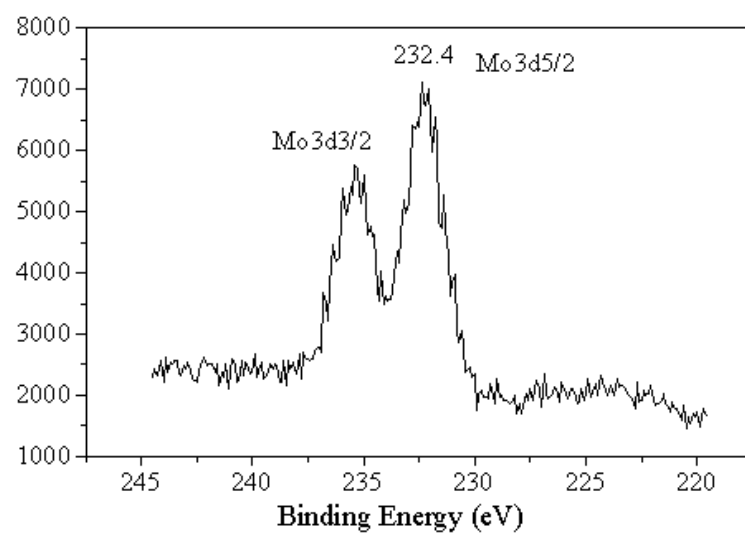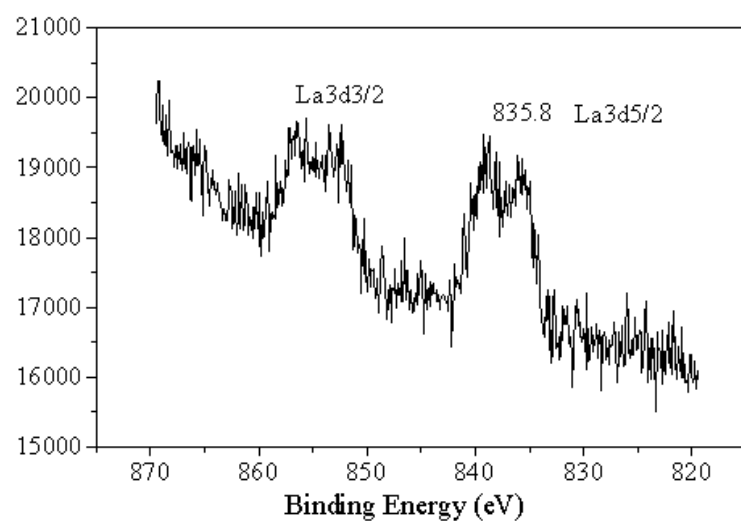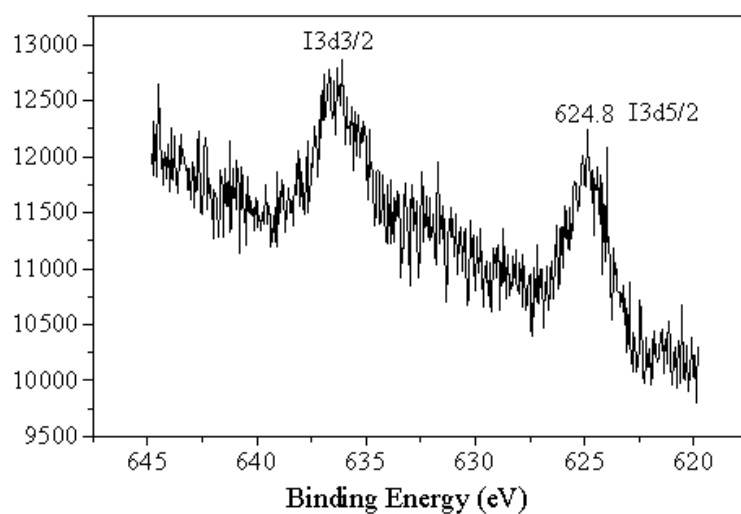

**Figure S5b**

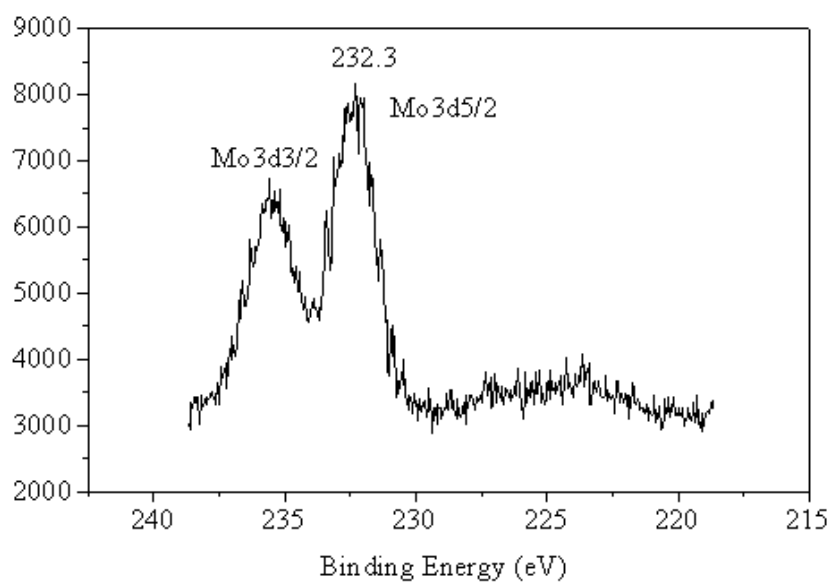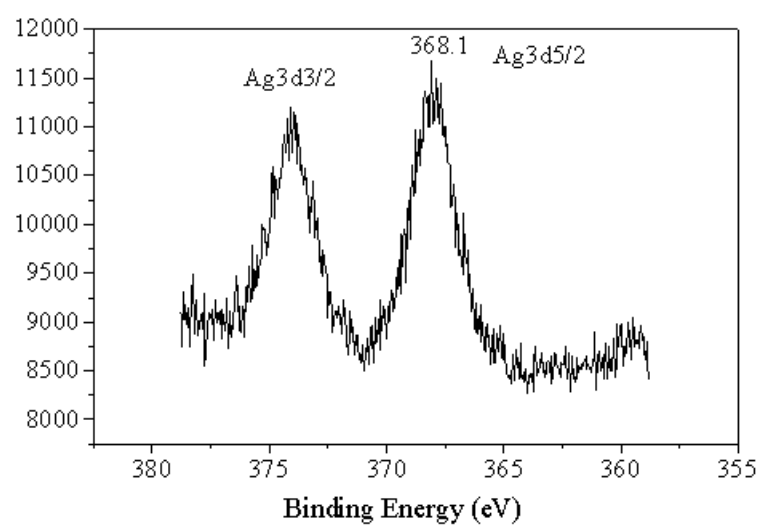

**Figure S5c**



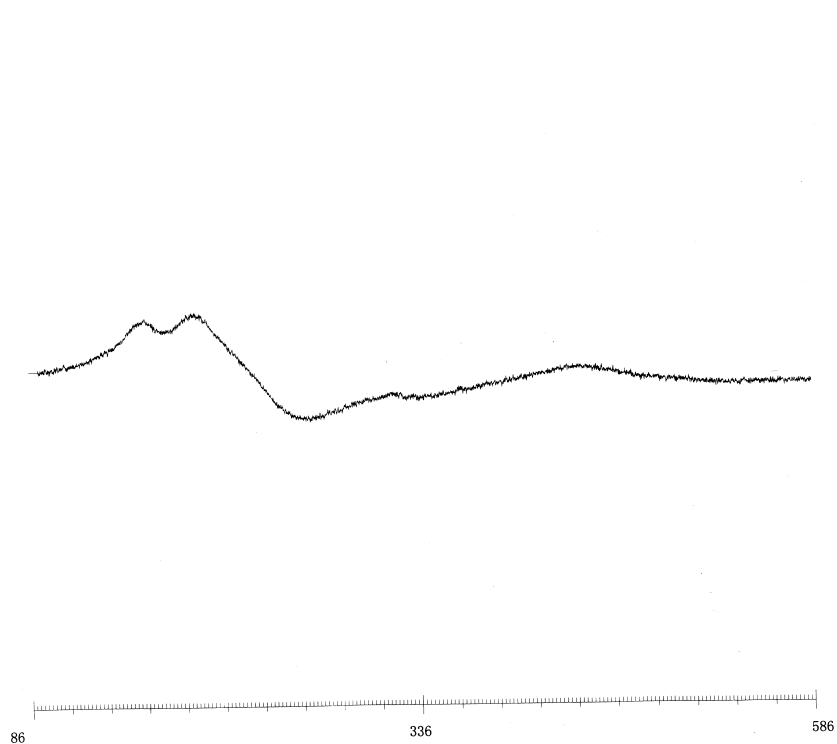

**Figure S6**

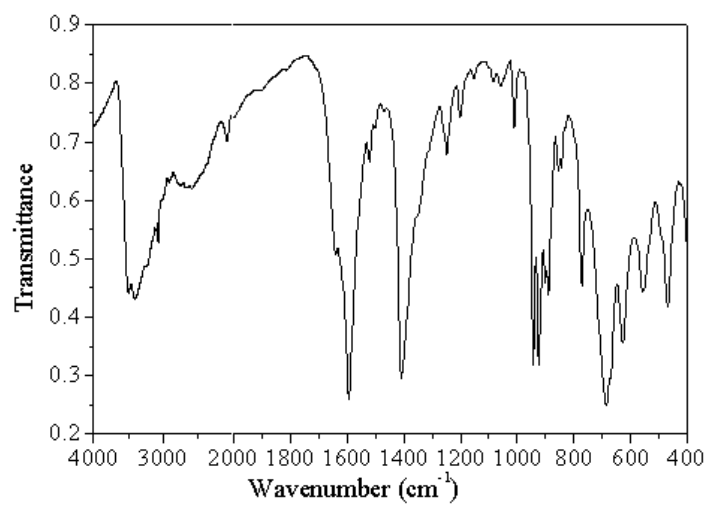

**Figure S7a**

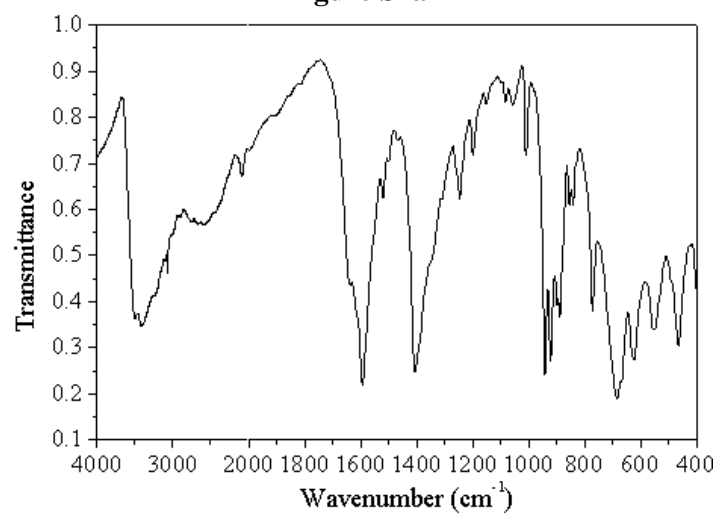

**Figure S7b**

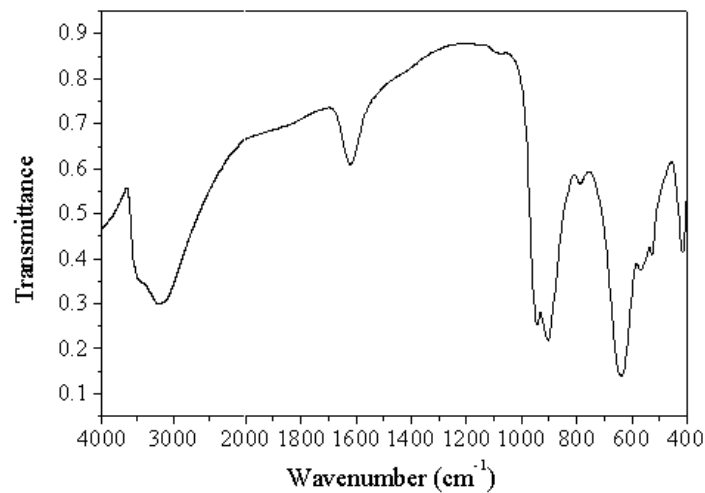

**Figure S7c**

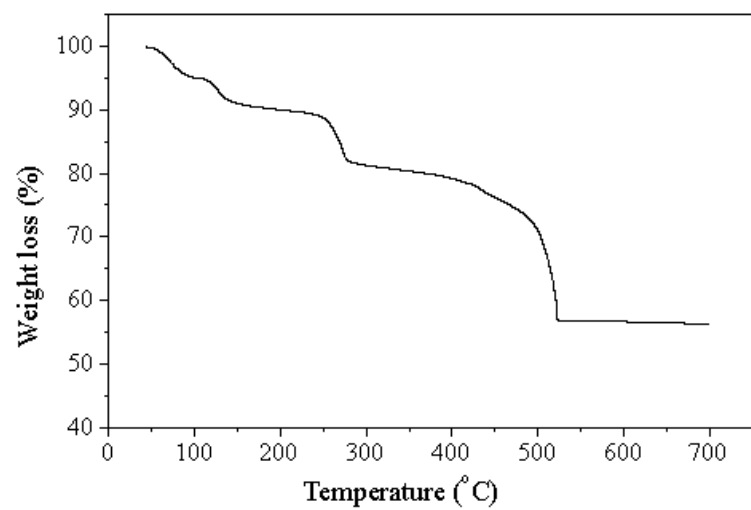

**Figure S8a**

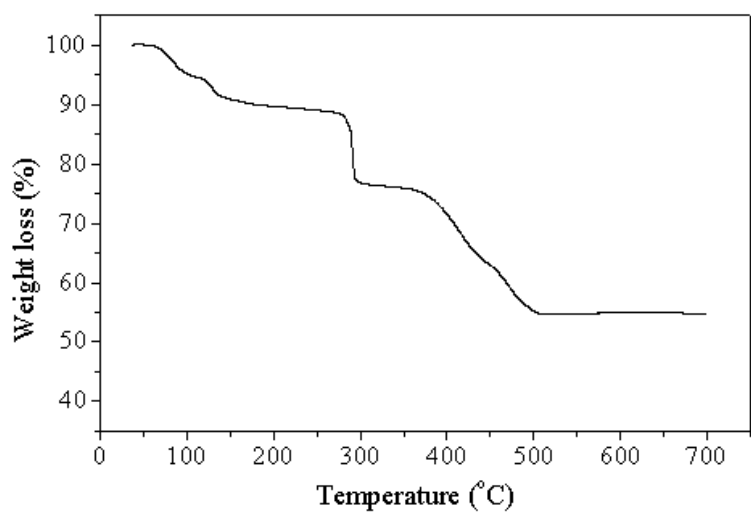

**Figure S8b**

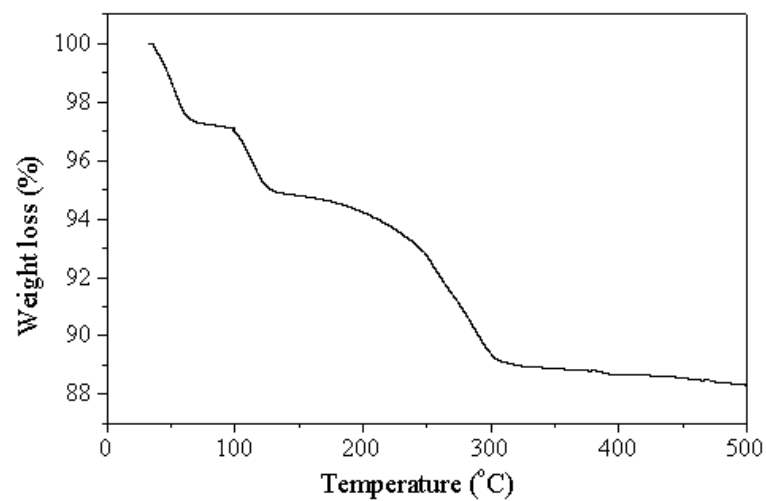

**Figure S8c**

**Table S1.** Relevant hydrogen-bonding distances in **1**.

| A...B    | Distance(Å) | A...B      | Distance(Å) |
|----------|-------------|------------|-------------|
| N1...O6  | 2.660       | O1...OW6A  | 2.805       |
| N2...O5  | 2.664       | O1...OW6B  | 2.802       |
| O2...OW5 | 2.800       | OW5...OW6A | 2.709       |
|          |             | OW5...OW6B | 2.703       |

**Table S2.** Relevant hydrogen-bonding distances in **2**.

| A...B     | Distance(Å) | A...B      | Distance(Å) |
|-----------|-------------|------------|-------------|
| N1...O4   | 2.669       | OW4...OW5  | 2.749       |
| N2...O6   | 2.648       | OW5...OW6A | 2.693       |
| O2...OW6A | 2.840       | OW5...OW6B | 2.718       |
| O2...OW6B | 2.765       |            |             |
